# Supplementary material
Source: publisher figshare collection journal article supplement (https://gsapubs.figshare.com/ndownloader/files/22745135)

**DATA REPOSITORY MATERIAL FOR**  
**Deformation of Gondwana Margin Turbidites during the Pampean Orogeny,**  
**North-central Argentina**

**Detailed Structural Data**

The locations for the data from the three areas, northern, transitional, and southern, are keyed to Fig. 1 of the main paper.

**Northern sections**

The Puncoviscana Formation (*sensu stricto*) in northern sections (the highest structural level) consists of a turbiditic sequence of 5 to 15 cm-thick greywacke beds alternating with 3 to 10 cm-thick shaly layers. Sedimentary structures, such as parallel- and cross-bedding, and flame structures are locally preserved in sandier layers. A weak, compaction-related, bedding-parallel cleavage ( $S_c$ ) occurs in greywacke and shale beds, but is better-developed in shales and pelites. In addition to  $S_c$ , a disjunctive fanning tectonic cleavage ( $S_1$ ) that is developed in pelites and locally observed as a flow cleavage, is associated with ubiquitous meter- to decameter-scale, upright chevron folds ( $F_1$ ) that have gentle N or NE plunges (Fig. DR1). These chevron folds are characteristic of all northern sections. Locally, chevron folds have less than 60° interlimb angles, saddle reefs, and hinge collapse structures.  $S_1$  planes have approximately 1cm spacing and generally intersect  $S_0$  and  $S_c$  at 10 to 15°. Younger meter- to decameter-scale, open to gentle folds ( $F_{1a}$ ) are characterized by rounded hinges, and sub-horizontal NNE-SSW axes.  $F_{1a}$  folds are coaxial with  $F_1$  and have no associated cleavage; their axial planes are sub-horizontal to subvertical, and dip to both east and west.

A variably developed, bedding-parallel, compaction cleavage ( $S_c$ ) is defined in shaly beds of the northern area by aligned detrital micas, pressure solution seams, and elongated quartz grains that are internally strain free (Fig. DR2a). The quartz grains have curved grain boundaries (Fig. DR2a) and pressure shadows consistent with pressure solution as the principal mechanism for shape change. A few large chlorite-mica stacks and detrital chlorite grains are kinked or oblique to the main cleavage (Fig. DR2a) and

exhibit pressure shadows in which fine-grained chlorite and/or quartz has precipitated. Greywackes contain discontinuous mica seams that are longer than individual quartz clasts and a locally well-defined grain alignment fabric ( $S_c$ ) that is bedding-parallel. Mica beards on clasts are aligned parallel to quartz grain long axes (Fig. DR2b) and stylolites sub-parallel to  $S_0$  have also been observed. Evidence of shearing on fold limbs is given by asymmetrical quartz grains and pressure shadows, and dissolved borders on quartz and mica grains.

### **Middle (transitional) sections**

The Hualinchay, Choromoro, Vipos, and Siambon sections (Fig. 1) contain up to 70 cm-thick alternations of psammitic and pelitic beds. Sedimentary structures (cross- and parallel-bedding) are well-preserved in psammitic layers. Pelites have a well-developed and continuous compaction-related ( $S_c$ ) cleavage that is parallel or subparallel to  $S_0$ , and a spaced, fanning  $S_1$  cleavage associated with meter-scale chevron  $F_1$  folds.  $S_1$  intersects  $S_0$  and  $S_c$  at 15-20° angles in chevron fold limbs. In psammites,  $S_1$  is a widely-spaced rough cleavage (~1-2 cm spacing), that locally intersects  $S_c$  (and  $S_0$ ) and becomes progressively more pervasive and better-defined southwards. This regularly spaced  $S_1$  cleavage is highly characteristic of outcrops throughout the transitional zone. In most outcrops, axial planes of close  $F_1$  folds dip steeply to the west; sub-horizontal  $F_1$  axes and parallel  $S_0/S_1$  intersection lineations generally trend NNE-SSW (Fig. DR3). Extension gashes, often filled with quartz fibers, are common in fold limbs. Collapse hinge structures are also common. In Siambon, mm- to cm-scale parasitic  $F_1$  folds are also observed.

Concentric, open to gentle, cm- to m-scale  $F_{1a}$  folds are generally coaxial with  $F_1$ , but their axes are more variable in orientation than those of  $F_1$  axes (Fig. DR3) and axial planes generally range from sub-horizontal to NE or NW steeply-dipping. Although there is an associated crenulation, no new mica growth is observed. Striations perpendicular to  $F_{1a}$  axes are common.  $F_1$ -related quartz-filled extension gashes are offset by bedding plane slip on  $F_{1a}$  fold limbs. We group these folds with  $F_{1a}$  elsewhere in the region.

To the east of Cumbres Calchaquies, in the Sierra del Nogalito (Fig. 1), there is a monotonous and tightly chevron-folded ( $F_1$ ) sequence of phyllites and biotite schists. Millimeter-scale, bedding-parallel banding ( $S_c$ ) strikes NE, and dips steeply to the NW (Fig. DR3). Thin (2–3mm) quartzitic layers alternate with 0.5–2mm-thick micaceous layers; no unambiguous sedimentary structures have been observed. Centimeter-scale chevron folds ( $F_1$ ) have NE-SW trending axes and axial planes dipping to the NW (Fig. DR3). In southern and more quartzitic localities of the Sierra del Nogalito,  $F_1$  folds are scarce.

In weakly metamorphosed pelites, a well-defined bedding-parallel fabric ( $S_c$ ) is defined by aligned, fine-grained detrital micas (Fig. DR2c). At progressively higher metamorphic grade, to the south, an increasing number of larger muscovite grains (100–150  $\mu\text{m}$ ) define  $S_c$ . Symmetric quartz and feldspar grains have dissolved, curved borders with thin layers of oxide deposits and a well-developed shape-preferred orientation parallel to  $S_c$  (Fig. DR2c). A superposed anastomosing tectonic cleavage,  $S_1$ , is defined by the alignment of new (50–100  $\mu\text{m}$ ) mica and chlorite grains oblique to  $S_0$  and  $S_c$  (Fig. DR2d) and by asymmetrically dissolved quartz grains with pressure shadows that contain fine-grained recrystallized quartz and chlorite.

Psammitic rocks derived from greywackes almost always contain 1 to 2 cm-thick quartz-rich lithons separated by distinctive, anastomosing 0.5–3 mm-thick mica-rich cleavage domains ( $S_c$ ) that are parallel or subparallel to  $S_0$ . Locally, grain size gradation (Fig. DR2d) and cross stratification are preserved. In the lithons, sub-rounded to angular quartz and feldspar clasts have locally interpenetrating grain boundaries and a well-developed shape-preferred orientation ( $S_c$ ) parallel to  $S_0$  (Fig. DR2e). Mica beards and asymmetric quartz and feldspar grains are common on fold limbs (Fig. DR2e). Isolated muscovite grains or thin mica-film segments define a weak, superimposed sigmoidal cleavage ( $S_1$ ) at approximately  $45^\circ$  to  $S_c$  (Fig. DR2e). The mica-rich  $S_c$  cleavage zones contain oxide-rich pressure solution seams and films of fine-grained tabular muscovites and chlorites that wrap around truncated quartz and feldspar clasts. Dissolved quartz grain borders and accumulation of oxides indicate that pressure solution was an important mechanism for both, the development of  $S_c$  and  $S_1$  in these rocks. A younger crenulation ( $F_{1a}$ ), affects pelitic and psammitic layers without the formation of new micas.

In the Nogalito area (Fig. 1), where metamorphism in the tightly chevron-folded schists reached biotite grade,  $S_c$  is defined by alternating 2–3 mm-thick quartz-rich lithons and 1 mm-thick mica-rich seams. Although the geometry of the regularly spaced  $S_c$  cleavage domains locally has the superficial appearance of sedimentary cross-stratification seen elsewhere in middle sections, the quartzitic lithons are here almost completely recrystallized and there is no evidence for graded bedding. On the limbs of cm-scale chevron folds, quartz and feldspar grains have a strong preferred shape orientation that is both parallel and oblique to layering ( $S_c$  and  $S_1$ , respectively), whereas in the chevron hinges, there is no axial plane cleavage visible and grains are equant, although relicts of an  $S_c$  defined by corroded biotites are still preserved. Quartz and feldspar grains have interpenetrating borders and most contain deformation bands and evidence for grain boundary migration. Mica-films within lithons are generally parallel to the long axis of quartz grains and contain mostly fibrous, pale biotite with lesser amounts of muscovite, which is more abundant in fold limbs than in hinges. On fold limbs, the mica seams contain large asymmetrical quartz and feldspar grains with dissolved borders and pressure shadows, and abundant pressure-solution seams. Tabular and well-developed muscovite, oriented parallel to the limbs of chevron folds, overgrows the biotites. Deformation twins in plagioclase grains, mechanical flexion of large (metamorphic) muscovites, and transgranular fractures are likely related to the younger, brittle folding episode ( $F_2$ ).

### **Southern sections**

To the south, recognizable psammites and pelites gradually change into banded schists and gneisses with a pervasive compositional banding. There are no preserved sedimentary structures. Close, decimeter to meter-scale harmonic chevron folds ( $F_1$ ) have sub-horizontal to moderately SE-plunging axes (Fig. DR4) and axial planes that dip to the NE. Asymmetric  $F_1$  parasitic folds are common, in contrast to northern areas where chevron folds have straight limbs, except where affected by  $F_{1a}$ . Axis-parallel mineral and intersection lineations ( $L_1$ ) plunge gently to SE. Occasional folded quartz veins have axial planes sub-parallel to the tectonic banding and 1–3 cm-thick calc-silicate veins

obliquely cut  $S_1$ . Post-tectonic andalusite, garnet, and staurolite porphyroblasts occur adjacent to Ordovician plutons (see also Toselli & Rossi de Toselli, 1984).

In the Sierra de Ambato area (Fig. 1), pelitic and psammitic schists that have a distinctive compositional banding are also affected by close, cm- to meter-scale  $F_1$  folds with an associated fanning cleavage  $S_1$  that strikes predominantly NNW-SSE and dips steeply to the WSW;  $F_1$  axes and an associated crenulation lineation ( $L_1$ ) plunge gently to the SE (Fig. DR4). Locally, mm-scale, post- $S_1$  garnet porphyroblasts are observed and cm-thick pegmatite veins profusely intrude the sequence, cross-cutting  $S_1$  at high angles. Shear bands of 0.5 to 1 m width, related to slip between layers during chevron folding, are common in  $F_1$  limbs and also affect the pegmatites.

The El Jumeal and Ancasti Formation rocks of the Sierra de Ancasti (Fig. 1; Willner, 1983; Willner & Miller, 1982) have a compositional banding that these authors interpret as  $S_1$  and which strikes NNW and dips steeply to NNE or SSW (Fig. DR4). Close  $F_1$  folds have axial plane foliations and sub-vertical to steeply NE-dipping axial planes. Asymmetrical parasitic folds are common and most fold axes and associated lineations plunge moderately to the NNW, less commonly to the SSE (Fig. DR4), except adjacent to Ordovician plutons, where the scatter of orientation is high.

In banded schists of southern sections,  $S_c$  is a well-developed solution cleavage and with increase in metamorphic temperature, there is an increase in quartz-vein segregations subparallel to  $S_0$ . Locally, these rocks underwent a regionally important post-tectonic (i.e., post  $F_1$ ) static metamorphic event that led to intense recrystallization of the sequence and porphyroblast growth (Toselli 1990; Toselli & Rossi de Toselli, 1990). In thin section, equant, polygonal quartz and plagioclase grains exhibit curved or straight borders and triple points. Despite this annealing overprint, it is still possible to identify at least two pre-annealing fabrics: an early-formed compositional banding (that is,  $S_0/S_c$ ) on fold limbs, and a later  $S_1$  that is axial planar to  $F_1$  folds (Fig. DR2f). Early-formed  $S_c$  is defined by alternating quartz-rich bands and bands of large corroded biotite grains that are kinked or show other signs of internal deformation such as micro-folding.  $S_1$  is defined by aligned, mm-scale euhedral biotite grains (Fig. DR2f). Post-tectonic

2006171

garnet porphyroblasts (1-2 mm diameter) do not contain inclusion trails, have no strain shadows, and none of the foliations present in the rock wraps around them (Fig. DR2f).

**Figure DR1.** Simplified geological map of northern sections (Fig. 1b) with structural data plotted on lower hemisphere stereographic projections. Number of structural data (stereoplot number between brackets): Tilcara (1)  $S_0$  n=149,  $S_1$  n=67; Cuevas (2)  $S_0$  n=18,  $S_1$  n=18,  $F_1$  axes n=7; Quebrada del Toro (3)  $S_0$  n= 49,  $S_1$  n=17,  $F_1$  axes n=16,  $F_{1a}$  axes n=18.

**Figure DR2.** Photomicrographs of  $S_c$  and  $S_1$  in shale and sandstone from Quebrada del Toro and Quebrada de Don Bartolo (Fig. 1b) and from pelites and psammites from Choromoro and Hualinchay sections (Fig. 1). a) Q. del Toro pelite:  $S_c$  defined by orientation of detrital micas and chlorite. Interspersed are quartz grains (long arrow) with dissolved borders and chlorite grains sub-perpendicular to  $S_c$  with asymmetric pressure shadows (short arrows). b) Q. de Don Bartolo sandstone: Micabeards (arrowed) on quartz (Q) and feldspar (F) clasts. c) Choromoro pelite:  $S_c$  defined by quartz, chlorite, and white mica grains.  $S_1$  defined by white mica only. d) Hualinchay section: Primary ( $S_0$ ) contact of pelitic (upper) and psammitic (lower) beds subparallel to  $S_c$ . Weakly anastomosing  $S_1$  defined by white micas and elongate quartz. Vertical arrow shows grain size gradation. e) Hualinchay psammite:  $S_c$  defined by preferred alignment of symmetric and asymmetric dissolved quartz grains (some with interpenetrated borders; short arrows), muscovite (M), and mica beards on quartz clasts (long arrow). f) Compositional banding ( $S_c$ ) and axial plane foliation ( $S_1$ , defined by biotites). Post-tectonic garnet (G) crosscuts the compositional banding and  $S_1$ . Quartz annealing occurred during Ordovician contact metamorphism.

**Figure DR3.** Simplified geological map of middle sections and Tafi (Fig. 1b). Legend for map and stereographic projections as in Figure DR1. Number of structural data (stereoplot number between brackets): Hualinchay (4)  $S_0$  n=163,  $S_1$  n=24,  $F_1$  axes n=15,  $F_{1a}$  n=62; Choromoro (5)  $S_0$  n=78,  $S_1$  n=15,  $F_1$  axes n=8,  $F_{1a}$  n=4; Nogalito (6)  $S_0$  n=27,  $F_1$  axes n=16,  $F_2$  n=13; Vipos (7)  $S_0$  n=61,  $S_1$  n=30,  $F_1$  axes n=5,  $F_{1a}$  n=4; Siambón (8)  $S_0$  n=51,  $S_1$  n=9,  $F_1$  axes n=4,  $F_{1a}$  n=15; Tafi (9)  $S_0$  n=46,  $S_1$  n=11,  $F_1$  axes n=17,  $F_{1a}$  n=3.

**Figure DR4.** Simplified geological map of southern sections (Fig. 1b). Legend for map and stereographic projections as in Figure DR1. Number of structural data (stereoplot number between brackets): S. Fernando (10)  $S_0$  n=10,  $S_1$  n=6,  $F_1$  axes n=21; N. Ancasti (11)  $S_0$  n=22,  $S_1$  n=3,  $F_1$  axes n=15.

**Figure DR5.** Sequence of geologic events observed in the Northern, Eastern and Southern Sierras Pampeanas. Data for San Lorenzo Volcanic Complex and Alto de las Salinas Complex from: Gonzalez et al., 2000. Data for Salta Group from: Del Papa and Salfity, 1999. Data for all other events from citations in the text.

## REFERENCES

- Toselli, A., 1990, Metamorfismo del Ciclo Pampeano, *in* Aceñolaza, F.G., Miller, H. and Toselli, A.J., eds., El Ciclo Pampeano en el Noroeste Argentino: San Miguel de Tucumán, Universidad Nacional de Tucumán, v. 4, p. 181-197.
- Toselli, A., and Rossi de Toselli, J. N., 1984, Metamorfismo de las Cumbres Calchaquies: II Petrología del basamento esquistoso entre La Angostura y Tafí del Valle, Tucumán: Revista de la Asociación Geológica Argentina, v. 39, p. 262-275.
- Toselli, A., and Rossi de Toselli, J. N., 1990, Plutonismo en la Formación Puncoviscana, *in* Aceñolaza, F.G., Miller, H. and Toselli, A.J., eds., El Ciclo Pampeano en el Noroeste Argentino: San Miguel de Tucumán, Universidad Nacional de Tucumán, v. 4, p. 221-227.
- Willner, A.P., 1983, Evolución tectónica, *in* Aceñolaza, F.G., Miller, H., Toselli, A., eds., La Geología de la Sierra de Ancasti: Munster, Munstersche Forschungen zur Geologie und Paleontologie, v. 59, p. 157-187.
- Willner, A.P., and Miller, H., 1982, Poliphase metamorphism in the Sierra de Ancasti (Pampean Ranges, NW Argentina) and its relation to deformation, *in* Congreso Latinoamericano de Geología: Buenos Aires, v. 3, p. 441-455.



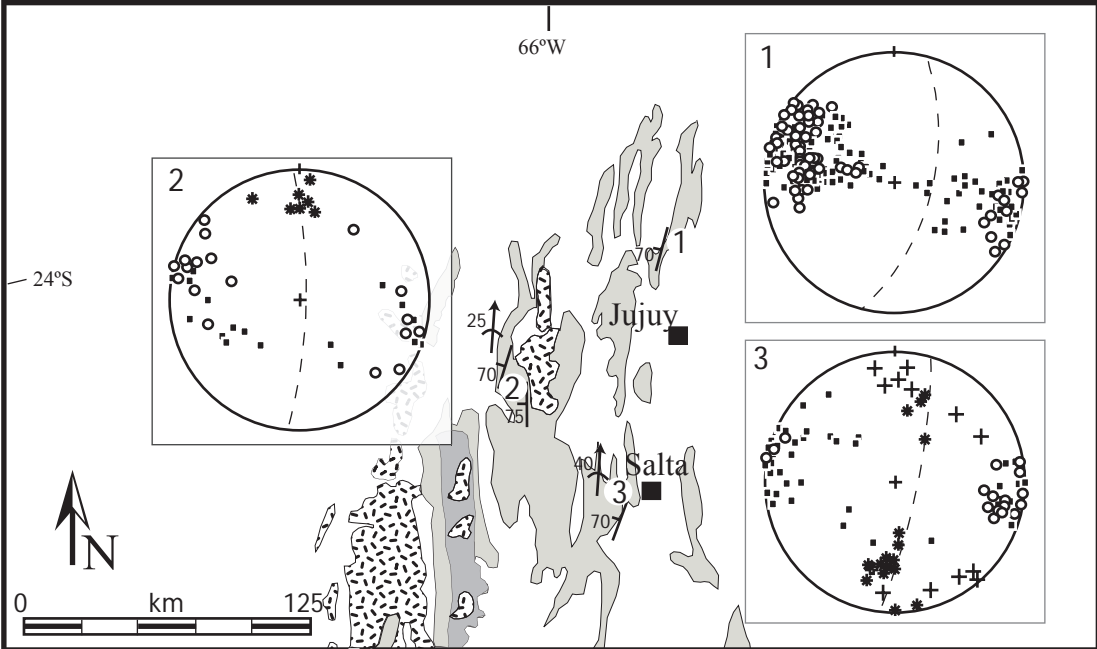

## Map:

- Bedding ( $S_0$ )
- $S_1$
- $F_1$  axis
- $F_{1a}$  axis
- $F_2$  (Andean axis)
- Region where structural data plotted
- Paleozoic intrusive and extrusive rocks
- High-grade metamorphic rocks
- Medium-grade metamorphic rocks
- Eocambrian Puncoviscana Fm.

## Stereoplots:

- poles to  $S_0$  or  $S_c$  planes
- poles to  $S_1$  planes
- $F_1$  axis
- $F_{1a}$  axis
- $F_2$  axis
- Dashed great circle: average  $S_0$

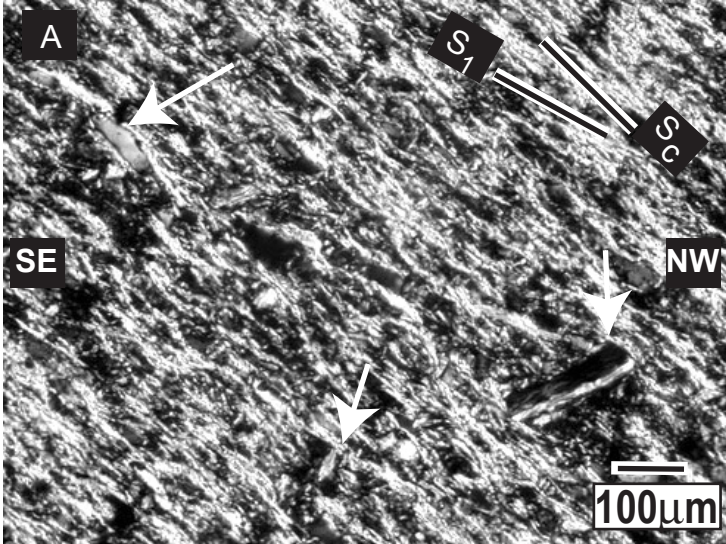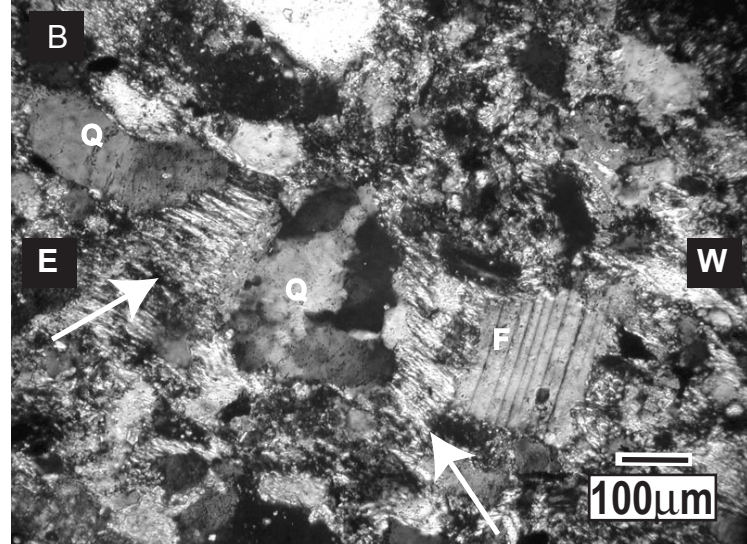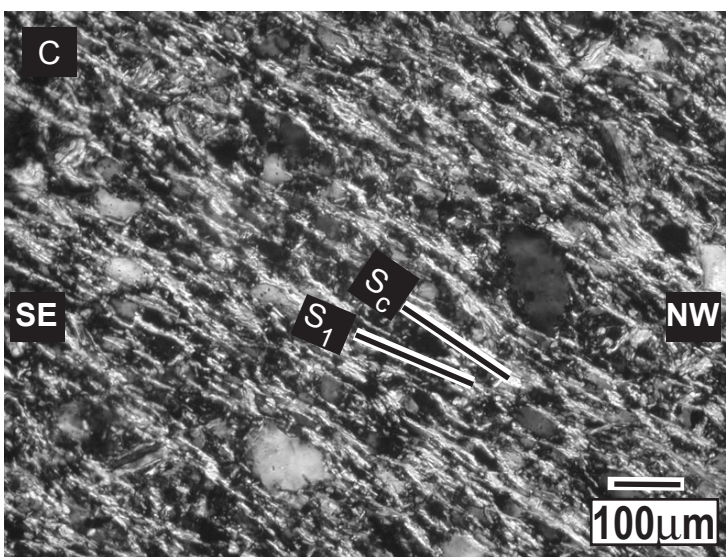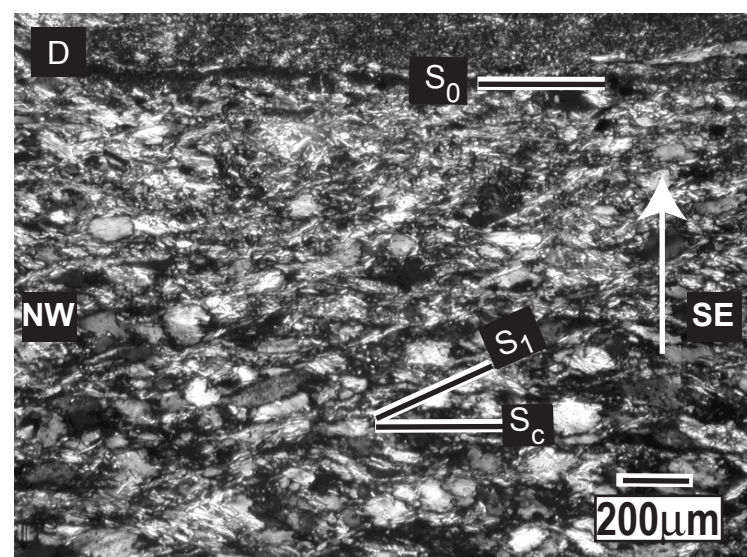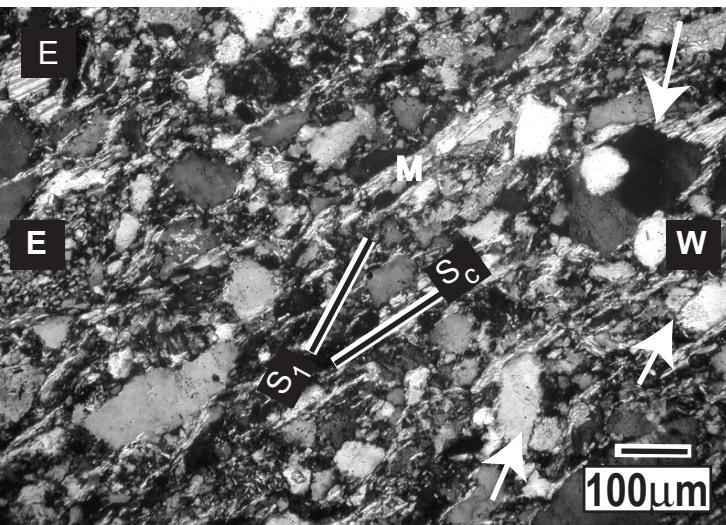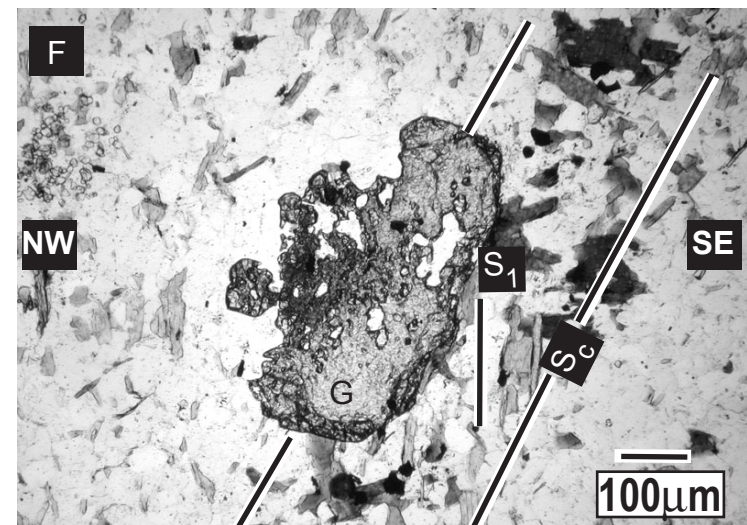



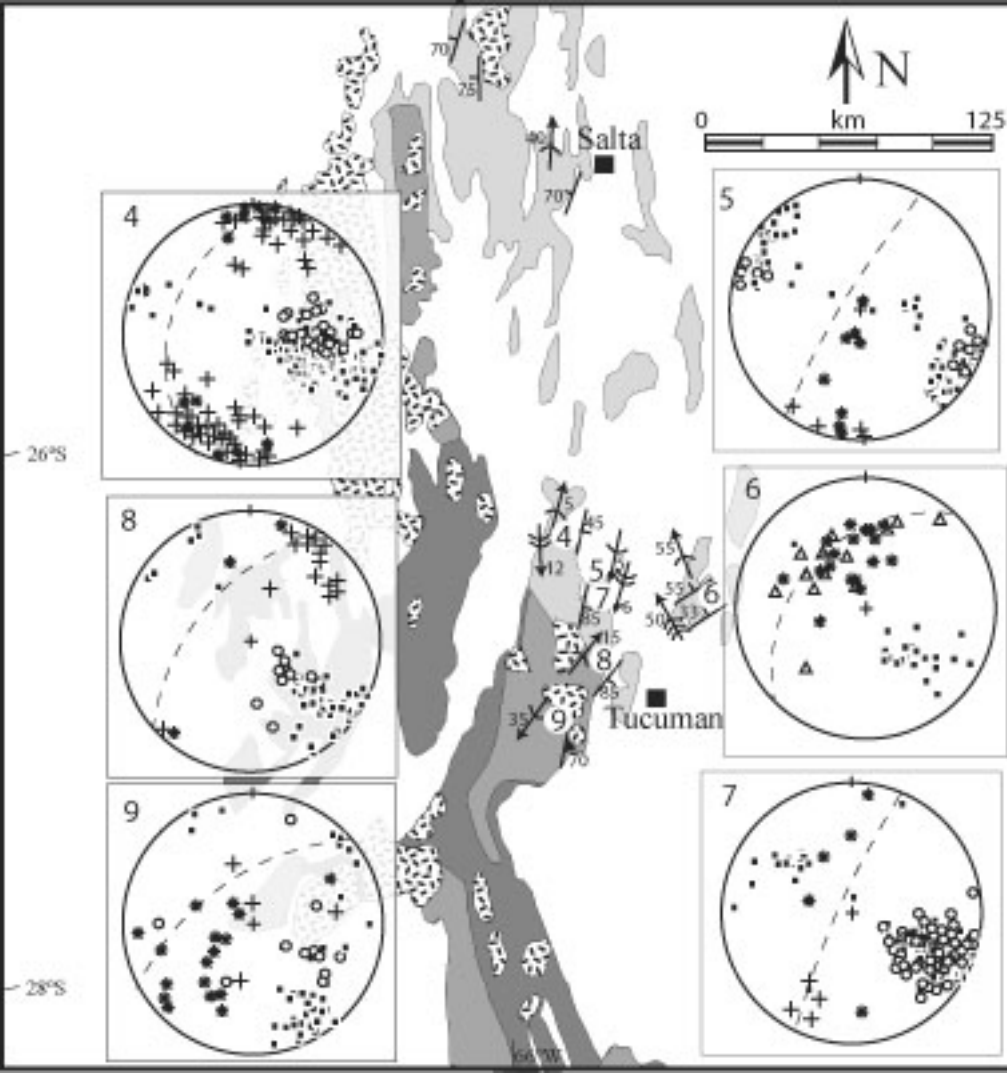

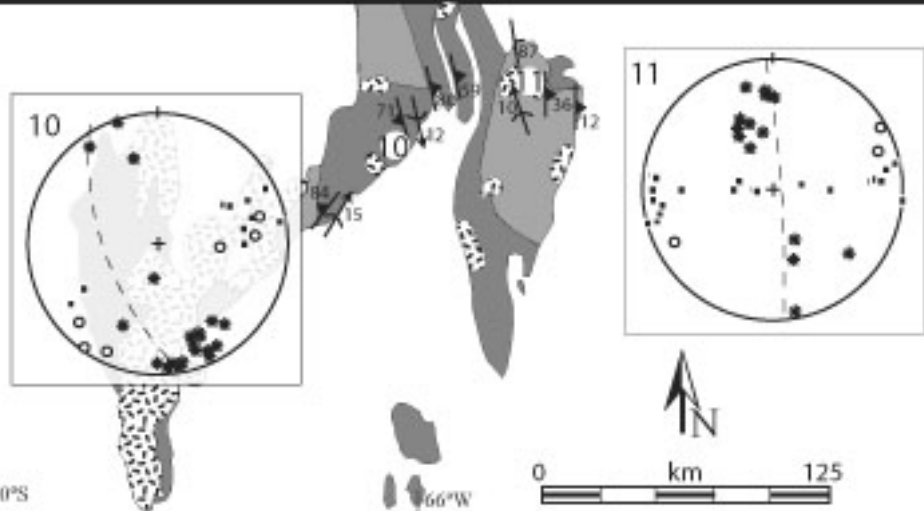

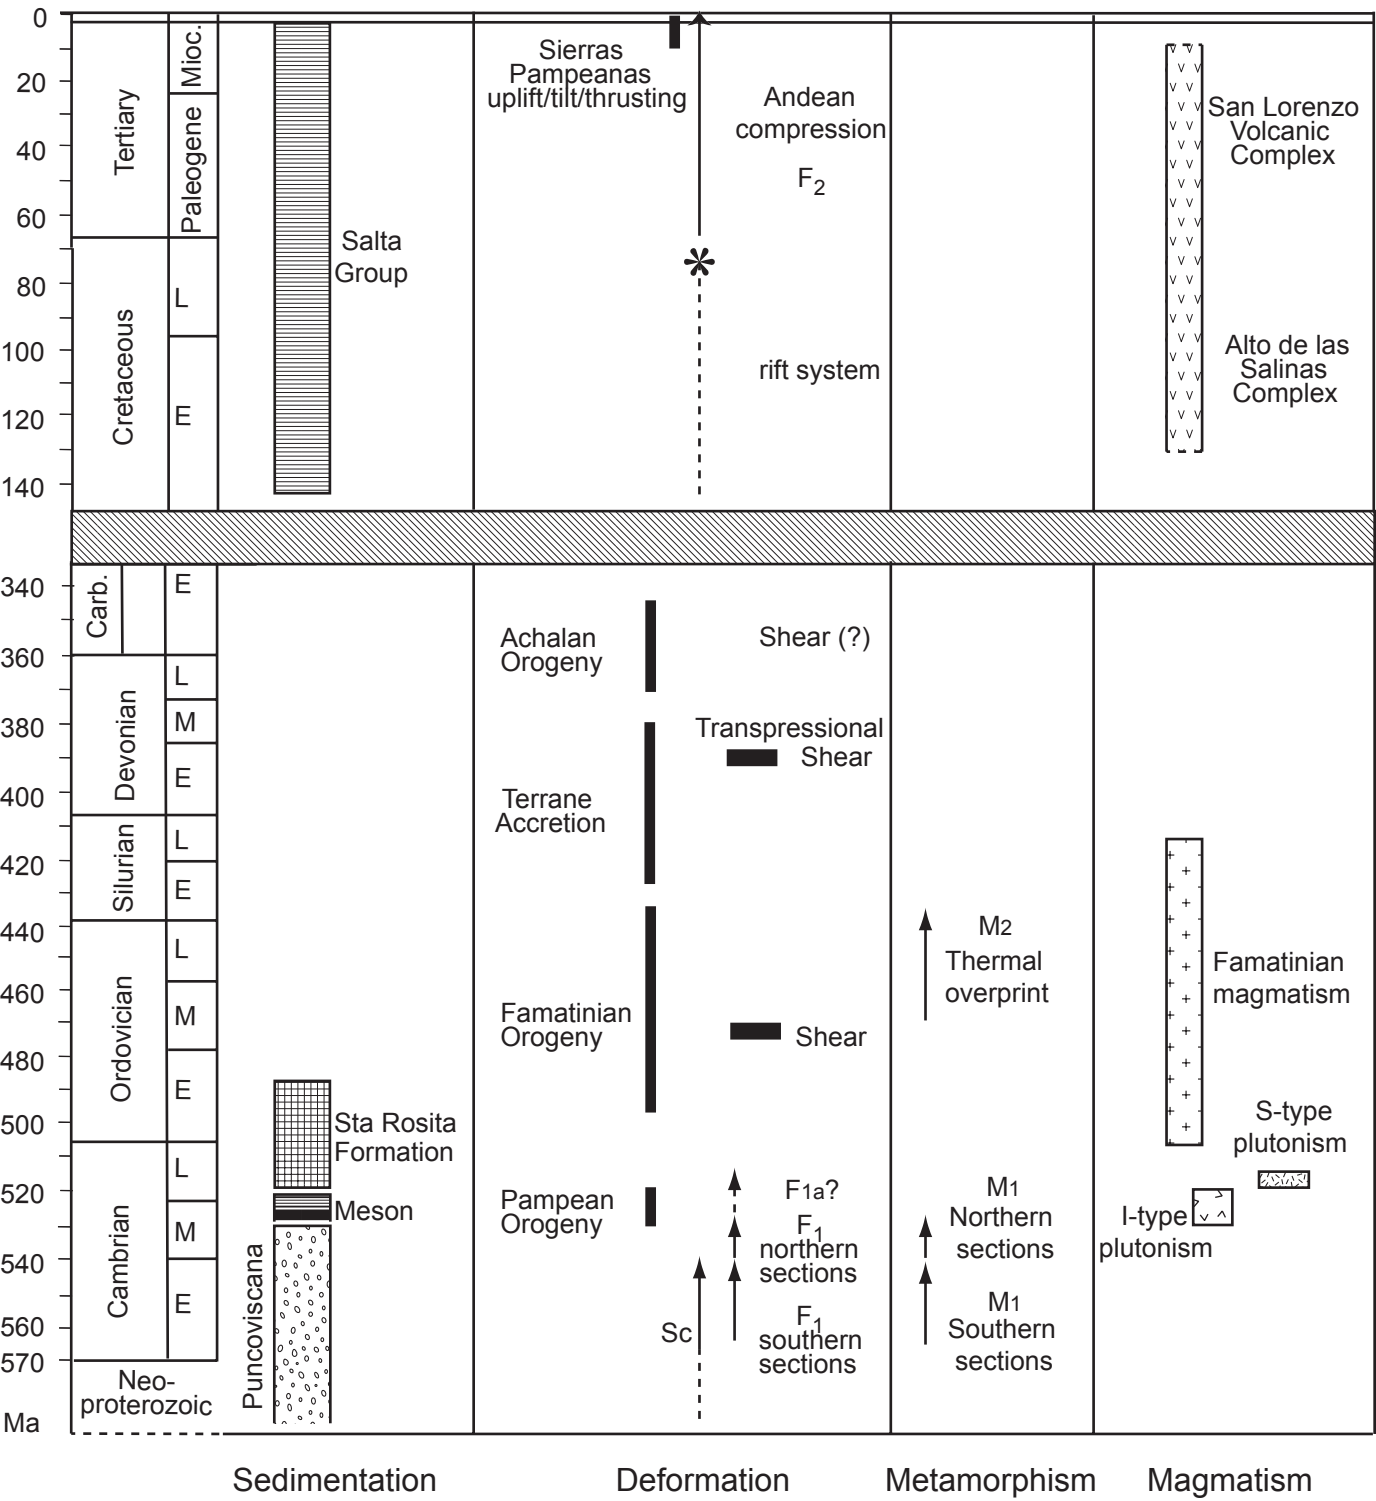

Supplement: Supplementary file 1 [file 22745135]
